# Live Zika virus chimeric vaccine candidate based on a yellow fever 17-D attenuated backbone

1  
2

3 Franck Touret<sup>1\*</sup>, Magali Gilles<sup>1</sup>, Raphaelle Klitting<sup>1</sup>, Fabien Aubry<sup>1</sup>, Xavier de-Lamballerie<sup>1</sup>  
4 and Antoine Nougairède<sup>1\*</sup>

5

6 <sup>1</sup>: Unité des Virus Émergents (UVE: Aix-Marseille Univ – IRD 190 – Inserm 1207 – IHU  
7 Méditerranée Infection), Marseille, France

8 \*Corresponding authors: [franck.touret@hotmail.fr](mailto:franck.touret@hotmail.fr) ; [antoine.nougairède@univ-amu.fr](mailto:antoine.nougairède@univ-amu.fr)

9

10

## 11 **Abstract**

12 Zika virus (ZIKV) recently dispersed throughout the tropics and sub-tropics causing epidemics  
13 associated with congenital disease and neurological complications. There is currently no  
14 commercial vaccine for ZIKV. Here we describe the initial development of a chimeric virus  
15 containing the prM/E proteins of a ZIKV epidemic strain incorporated into a yellow fever 17-  
16 D attenuated backbone. Using the versatile and rapid ISA (Infectious Subgenomic Amplicons)  
17 reverse genetics method, we compared different constructs and confirmed the need to modify  
18 the cleavage site between the pre-peptide and prM protein. Genotypic characterization of the  
19 chimeras indicates that emergence of compensatory mutations in the E protein is required to  
20 restore virus replicative fitness. Using an immunocompromised mouse model, we demonstrate  
21 that mice infected with the chimeric virus produced levels of neutralizing antibodies close to  
22 those observed following infection with ZIKV and that pre-immunized mice were protected  
23 against viscerotropic and neuroinvasive virus following challenge with a heterologous strain of  
24 ZIKV. These data provide a sound basis for the future development of this ZIKV vaccine  
25 candidate.

## 26 Introduction

27 Zika virus (ZIKV; family *Flaviviridae*, genus *Flavivirus*) is a single-stranded positive-sense  
28 enveloped RNA virus. Its genome of 10.8 kb encodes a single polyprotein which is processed  
29 into three structural proteins (C, PrM and E), and seven nonstructural proteins (NS1, NS2A,  
30 NS2B, NS3, NS4A, NS4B and NS5) by viral and host proteases<sup>1</sup>. Phylogenetic studies showed  
31 that all ZIKV strains characterized so far belonged among two distinct lineages (African and  
32 Asian) based on the initial geographic distribution of this virus<sup>2</sup>. ZIKV is a mosquito-borne  
33 flavivirus transmitted primarily by *Aedes spp.* mosquitoes<sup>3</sup>.

34 Long considered to cause mild disease in humans, this arbovirus remained relatively unstudied  
35 until 2007, when it provoked a large outbreak in Micronesia<sup>4</sup>. Subsequently, several outbreaks  
36 occurred in different Pacific Ocean islands including French Polynesia in 2013, where it was  
37 associated with an increase of Guillain-Barré syndrome<sup>5</sup>. ZIKV then spread to the American  
38 continent causing major outbreaks in Central/South America and the Caribbean and was linked  
39 with an increase of congenital neurological complications. Sexual transmission of ZIKV was  
40 also reported<sup>6</sup>. There is currently no commercial antiviral drug or vaccine for this virus<sup>7</sup>.

41 Several approaches are now available with which to develop inactivated<sup>8</sup> and recombinant  
42 (DNA-<sup>9</sup> or RNA-based<sup>10</sup>) ZIKV vaccines. However, live attenuated vaccines have several  
43 advantages including reduced costs and single dose induction of long-term immunity<sup>11</sup>. Several  
44 groups developed live ZIKV vaccine candidates by deletions in the 3' untranslated region of  
45 the viral genome<sup>12,13</sup>. More recently, a chimeric ZIKV vaccine candidate based on the Japanese  
46 encephalitis virus live-attenuated strain SA14-14-2 was reported<sup>14</sup>. The chimeric approach had  
47 been used since the late 1990s to develop vaccine candidates against several health-threatening  
48 flaviviruses including West-Nile virus, Japanese encephalitis virus and all serotypes of the  
49 dengue virus<sup>15-17</sup>. This approach consists of incorporating prM/E of a pathogenic flavivirus in  
50 a backbone of a licensed live-attenuated vaccine strain. Indeed, E protein is prominently  
51 exposed at the surface of viral particles and is *de facto* the major determinant of viral  
52 antigenicity<sup>1</sup>. In almost all cases, the well-characterized live attenuated 17-D strain used to  
53 prevent yellow fever virus (YFV) infections has been used as the genetic backbone. Some of  
54 these live-attenuated vaccines are currently commercially available<sup>18,19</sup>.

55 Here we describe the development of a chimeric virus harboring the prM/E of an epidemic  
56 ZIKV (H/PF/2013) strain and the 17-D vaccine strain as the genetic backbone. The user-  
57 friendly and rapid ISA (Infectious Subgenomic Amplicons) reverse genetics method was used  
58 to generate this chimeric virus<sup>20</sup>. Finally, *in cellulo* and *in vivo* characterization of this strain  
59 demonstrated its potential to become a live-attenuated vaccine candidate.

60

## 61 **Results**

### 62 **Design and rescue of chimeric viruses**

63 The chimeric viruses were constructed using the yellow fever 17-D vaccine strain as a genetic  
64 backbone and by replacing the prM/E of this vaccine strain by those of the Asian ZIKV PF  
65 epidemic strains. Three different constructs, designated A, B and C, were constructed using  
66 variable sites flanking ZIKV prM/E coding sequences (Fig.1). Construct A harbored the pre-  
67 peptide and cleavage site before prM from the 17-D vaccine strain. Construct B harbored the  
68 pre-peptide from the 17-D vaccine strain and cleavage site before prM from ZIKV. Construct  
69 C harbored the pre-peptide and cleavage site before the prM from ZIKV. They all contained  
70 the cleavage site of the 17-D vaccine strain between E and NS1 proteins.

71 The ISA procedure was used to rescue the viruses: Three overlapping amplicons that contain  
72 the complete genome flanked at its 5' and 3' extremities respectively by the human  
73 cytomegalovirus promoter (pCMV) and the hepatitis delta ribozyme followed by the simian  
74 virus 40 polyadenylation signal (HDR/SV40pA) were transfected into a mix of HEK-  
75 293/BHK21 cells. Because the first amplicon contains the entire structural coding region, it was  
76 only necessary to exchange the first amplicon of our already functional yellow fever 17-D  
77 vaccine strain reverse genetic system to attempt replicative virus production.

78 For each construct, we performed two independent cell transfection experiments of five  
79 replicates. After an incubation of six days, cell supernatant media were passaged four times in  
80 Vero-E6 cells. Virus replication was assessed in cell supernatant medium at the last passage  
81 (called passage #4) using a real-time quantitative RT-PCR assay. No viral replication was  
82 detected for constructs A and B. In contrast, we detected, with construct C, virus replication in  
83 one well (1/5) in both independent transfection experiments. These results highlighted the fact  
84 that the choice of the nature of the pre-peptide and cleavage site between the capsid and prM  
85 proteins is a crucial parameter when designing chimeric flaviviruses. During the first cell  
86 transfection experiment, we obtained at passage #4 high amounts of viral genome copies (1.78  
87 e+9 viral RNA copies/mL). This virus was designated CH-17-D/ZIKV and used for *in cellulo*  
88 and *in vivo* characterizations. Surprisingly, during the second experiment, we detected very low  
89 quantities of viral genome at passage #4 (3.57 e+3 viral RNA copies/mL). This virus was  
90 designated CH-17-D/ZIKV\*. We then performed four additional passages using the same  
91 procedure. Quantities of viral genomes in cell supernatants media were assessed from passage  
92 #1 to #8 and compared with that of CH-17-D/ZIKV (Fig. 2). We found that amounts of viral  
93 genomes for CH-17-D/ZIKV reached a plateau at passage #2. In contrast, we observed an  
94 increase in the production of CH-17-D/ZIKV\* from passage #6 to passage #8 where amounts  
95 of viral genome reached values similar to those observed with CH-17-D/ZIKV (2,67e+9 viral  
96 RNA copies/mL) (Fig. 2).

## 97 **CH-17-D/ZIKV genotypic characterization**

98 In order to find the genotypic determinants associated with the difference of viral replication  
99 observed between CH-17-D/ZIKV and CH-17-D/ZIKV\*, the complete genome of CH-17-  
100 D/ZIKV was obtained at passage #2 and #4 and compared with the sequence of the original  
101 construct. Only five substitutions were detected at passage #2 of which two were non-  
102 synonymous confirming the genome integrity of this strain (Table 1). Four of them were already  
103 fixed or almost fixed. At passage #4, all these mutations were fixed and no additional mutations  
104 were found. Interestingly, both non-synonymous mutations are located in domain II of E  
105 protein, respectively at residues E255 and E285<sup>21</sup>. Consequently, we determined the sequence  
106 of the 5' region of the viral genome of CH-17-D/ZIKV\* (until NS1 coding region) at passage  
107 #4 and the complete genome sequence of CH-17-D/ZIKV\* at passage #8 (Table 1). While only  
108 one transitory substitution was detected at passage #4, all the mutations found with CH-17-  
109 D/ZIKV were detected at passage #8 including the two non-synonymous mutations located in  
110 E coding region. This high level of parallel evolution associated with the chronology of events  
111 strongly suggests that these five mutations are associated with the increase of replicative fitness  
112 observed with both viruses.

## 113 **CH-17-D/ZIKV initial characterization**

114 To confirm the presence of the ZIKV E protein in Vero-E6 cells infected by the chimeric virus,  
115 we performed an indirect immunofluorescence assay using a specific ZIKV immune serum as  
116 the primary antibody (Fig. 3A). ZIKV PF and the 17-D vaccine strains were used as positive  
117 and negative controls. As expected, no fluorescence was observed with the 17-D vaccine strain  
118 and positive cells were observed at day 2 and 5 post-infection with both chimeric and ZIKV  
119 strains confirming that the ZIKV E protein is expressed in infected cells. At day 2 post-  
120 infection, the number of positive cells with ZIKV is higher than with CH-17-D/ZIKV in  
121 agreement with growth replication kinetics in VeroE6 cells. Since a cytopathic effect was  
122 observed with the ZIKV strain at day 5, the number of positive cells was lower with this virus.  
123 Viability assays in Vero-E6 cells confirmed this observation: the CH-17-D/ZIKV virus is less  
124 cytopathic (mean value: 73% of cell viability) at day 5 post-infection than the ZIKV (mean  
125 value: 49% of cell viability) (Supplemental Fig. 1). We then performed comparative growth  
126 kinetics of these viruses in three different cell lines (HUH7.5, HEK-293 and Vero-E6). Cell  
127 supernatant media were harvested at different time points after infection to assess the amount  
128 of viral RNA (Fig. 3B, 3C and 3D). Similar growth kinetics curves were observed for all viruses  
129 in HUH7.5. In Vero-E6 cells, higher amounts of viral genome were not found in cell  
130 supernatants until day 5 post-infection with the chimeric virus. In HEK-293 cells, the chimeric  
131 virus had similar behavior to that of the 17-D vaccine strain.

132

### 133 **CH-17-D/ZIKV characterization in Vero cells**

134 Since Vero cells are widely used for vaccine production<sup>22</sup>, we characterized CH-17-D/ZIKV in  
135 this cell line. Because CH-17-D/ZIKV is already adapted at passage #4 (see above), we used  
136 cell supernatant from this passage to perform growth kinetics in Vero cells. Cell supernatant  
137 media were harvested at different time points after infection to assess infectious titers (TCID<sub>50</sub>  
138 assay) and the amount of viral RNA (Fig. 3E/F). The results showed that these cells enabled  
139 the production of highly infectious viral particle at day 6 post-infection. We also studied the  
140 genetic stability of CH-17-D/ZIKV by performing 6 additional passages in Vero cells and the  
141 complete genome sequence was obtained at passage #8 and #10 (Table 1). Our findings  
142 revealed remarkable genetic stability since all mutations at passage #4 remained stable and no  
143 additional mutation was detected.

### 144 **CH-17-D/ZIKV *in vivo* characterization**

145 Because ZIKV and 17-D vaccine strain do not replicate in immunocompetent mice, we used  
146 immunocompromised mice as model to study the chimeric virus *in vivo*. Each time animals  
147 were immunized or infected, they were transiently immunocompromised following a two-step  
148 inoculation of anti-IFNAR antibody<sup>23-25</sup> as described in the Methods section.

149 Six groups of four mice were inoculated with two different dosages of CH-17-D/ZIKV,  
150 ZIKV, 17-D vaccine strain to assess antibody production (Fig. 4A). A control group (mock) of  
151 four mice were inoculated with PBS. Twenty-one days after immunization, mice were  
152 sacrificed and their sera were tested for the presence of antibodies to ZIKV and YFV (Fig. 4B  
153 and 4C) using a viral RNA Yield Reduction Neutralization Test (YRNT; see Methods). As a  
154 result, we demonstrated that immunization with the chimeric virus induced production of  
155 neutralizing antibodies against ZIKV confirming the starting hypothesis of this study. We  
156 detected a slightly higher level of neutralizing antibodies when mice were infected with ZIKV.  
157 In all cases, both dosages used induced comparable neutralizing titers. Consistently with  
158 previous studies, mice immunized with the 17-D vaccine strain did not produce antibodies  
159 against ZIKV. Indeed, based on the amino acid sequence divergence of antigenic proteins, it is  
160 well established that no cross-neutralizing activity exists between these two distant  
161 flaviviruses<sup>26</sup>. As expected, mice immunized with the 17-D vaccine strain produced high levels  
162 of neutralizing antibodies against YFV while those infected with ZIKV did not produce any  
163 antibodies against YFV. Interestingly, immunization with CH-17-D/ZIKV induced production  
164 of neutralizing antibodies against YFV. This result demonstrated the immunogenicity of the  
165 viral proteins encoded by the 17-D vaccine strain backbone. We also attempted to isolate  
166 chimeric virus from animal blood samples to assess the ability of the chimeric virus to replicate  
167 *in vivo*. At day 2 and 3 post immunization, to avoid the possibility of isolating residual virus  
168 from the immunization, we collected a blood drop from the mice tail and found two positive  
169 samples (one at each day) (Supplemental Fig. 2). These findings suggest that CH-17-D/ZIKV

170 is able to replicate in mice since comparable neutralizing titers were measured with all mice  
171 immunized.

172 In another experiment, we assessed protection against subsequent infection by wild-type ZIKV  
173 following immunization with CH-17-D/ZIKV or 17-D vaccine strain (Fig. 5A). Groups of mice  
174 were immunized with two dosages of CH-17-D/ZIKV and 17-D vaccine strain twenty-one days  
175 prior to challenge with a ZIKV African strain (Dak84). Three control groups were also used:  
176 one immunized with PBS and then challenged (named unvaccinated group), one immunized  
177 with ZIKV PF and then challenged (named ZIKV PF group) and one immunized and challenged  
178 with PBS (mock). Since 100% of the mice of the control group ZIKV PF were viremic at day  
179 2 and 3 post-challenge, this criterion was not used to assess protection (Supplemental Fig. 3  
180 and Supplemental Table 1). Thereby, the protection was evaluated by determining the  
181 proportion of mice with organs (brain and spleen) positive for the presence of ZIKV at day 10  
182 post-challenge. We observed that 10% of the spleens and brains from mice immunized with the  
183 chimeric virus (both groups) were positive (Table 2). In contrast, respectively 100% and 87.5%  
184 of the spleens and brains from mice immunized with the 17-D vaccine strain (both groups) were  
185 positive ( $p$  value = 0.0004 for spleens and 0.0029 for brains; Fisher exact test). As expected  
186 100% and 0% of the organs respectively from mice of the unvaccinated group and from the  
187 ZIKV PF group were positive. Viral RNA yields found in the organs were quite variable in all  
188 positive samples (Fig. 5B). These results demonstrated that immunization with the chimeric  
189 virus significantly protected mice against the systemic and brain infection induced by a  
190 heterologous ZIKV strain.

191  
192

## 193 **Discussion**

194 We present here the initial development of a chimeric ZIKV live-attenuated vaccine candidate  
195 based on a yellow fever attenuated 17-D genetic backbone. Using the ISA reverse genetics  
196 method, we were able to rapidly test several associations of subgenomic amplicons starting  
197 from a pre-existing 17-D vaccine strain reverse genetics system. This method was recently  
198 applied to Asian and African strains of ZIKV<sup>27</sup>.

199 Three different designs were tested to incorporate the prM/E of ZIKV in the 17-D vaccine  
200 genetic backbone. Our results highlighted the necessity of modifying the cleavage site between  
201 the pre-peptide and prM protein for the construction of chimeric viruses as already described  
202 during development of chimeric ZIKV/DENV and DENV/ZIKV strains<sup>28</sup>.

203 Nevertheless, we also demonstrated that chimeric viruses needed to acquire adaptive mutations  
204 to properly replicate in mammalian cells. Indeed, we observed low-percentage of virus recovery  
205 during cell transfection experiments and both replicative viruses rescued shared five



206 substitutions of which two were non-synonymous and located in domain II of the E protein.  
207 Interestingly, mutations located in this particular domain of the E protein were previously  
208 described *in cellulo* with 17-D vaccine strain based chimeric flaviviruses (DENV type 1/2 and  
209 Japanese encephalitis virus)<sup>29,30</sup>. These findings suggest that emergence of compensatory  
210 mutations in the E protein is probably necessary to restore the replicative fitness of the virus  
211 following exchange of two of its structural proteins.

212 By comparing the growth properties of our chimeric virus with its two parental strains in  
213 different mammalian cells, we found that this new synthetic virus had its own biological  
214 properties probably in relation to the nature of this new association of viral proteins. In fact, we  
215 observed that this strain is fitter than parental strains in Vero-E6 cells and close to 17-D vaccine  
216 strain in HEK-293 cells.

217 Genetic stability is a major concern when designing future live-attenuated vaccine candidates.  
218 Using Vero cells, widely used for vaccine production<sup>22</sup> and the adapted chimeric virus, we  
219 performed serial passages to assess this essential criterion. We demonstrated that once initial  
220 adaptation was achieved, the chimeric virus remained genetically stable.

221 We used transitory immunocompromised mice as an animal model system to characterize *in*  
222 *vivo* the chimeric virus. We demonstrated that mice infected with this virus produced levels of  
223 neutralizing antibodies close to those observed following infection by ZIKV. Our results also  
224 showed that immunization using the chimeric strain significantly protected mice against brain  
225 and spleen invasion induced by a heterologous strain of ZIKV. Altogether, these results provide  
226 evidence that this chimeric strain had all the prerequisites to be tested in a more relevant animal  
227 model such as the microcephalic sensitive mouse model<sup>31</sup>.

228 The strategy used in the present study to develop a live ZIKV vaccine candidate has several  
229 advantages: the 17-D vaccine strain has long history of use in hundreds of millions of persons<sup>32</sup>  
230 and is considered as the safest live-attenuated vaccine<sup>33</sup>. Moreover, in comparison with targeted  
231 attenuation strategies such as local modification of genomic region, our approach eliminates  
232 the risk of phenotype reversion by potential homologous recombination. Finally, although  
233 potential occurrence of antibody dependent enhancement phenomenon consecutive has to be  
234 considered with chimeric vaccine, there is currently no epidemiological data supporting this  
235 hypothesis in area where several flaviviruses co-circulate<sup>34</sup>.

236 In conclusion, our data provide sound basis for the future development of this vaccine  
237 candidate. Furthermore, the approach used in this study to rescue the chimeric virus showed  
238 that significant advances in the development of reverse genetics methods now offer the  
239 possibility of drastically reducing the timeframe between the emergence of a novel viral  
240 pathogen and the availability of a live-attenuated vaccine candidate.

241

242

## 243 **Materials and Methods**

244

### 245 **Cell lines**

246 All cells were grown at 37 °C in 5% CO<sub>2</sub> with 1% Penicillin/Streptomycin (PS; 5000U.mL<sup>-1</sup>  
247 and 5000µg.mL<sup>-1</sup>; Life Technologies) and supplemented with 1% non-essential amino acids  
248 (Life Technologies) in media as specified below.

249 Baby hamster kidney (BHK-21; ATCC number CCL-10), human hepatocellular carcinoma  
250 (HUH7.5; <sup>35</sup>) and human embryonic kidney (HEK-293; ATCC number CCL-1573) cells were  
251 grown in Dulbecco's Modified Eagle's Medium High glucose (4500 mg/l) (Life Technologies)  
252 with 7.5% heat-inactivated fetal bovine serum (FBS; Life Technologies). Vero (ATCC number  
253 CCL-81) and Vero-E6 (ATCC number CRL-1586) cells were grown in minimal essential  
254 medium (Life Technologies) with 7.5% FBS.

255

### 256 **Viruses**

257 ZIKV Asian lineage strains PF (H/PF/2013, GenBank accession number: KJ776791) and  
258 Mart2015 (MRS\_OPY\_Martinique\_PaRi\_2015, GenBank accession number: KU647676),  
259 ZIKV African lineage strain Dak84 (A.taylori-tc/SEN/1984/41662-DAK, GenBank  
260 accession number: KU955592), YFV 17-D strain (produced by reverse genetics as described  
261 below; GenBank accession number: EU074025) and YFV strain BOL 88/1999 (isolated in 2009  
262 from human serum and kindly provided by the National Center of Tropical Diseases  
263 (CENETROP), Santa-Cruz, Bolivia, GenBank accession number: [KF907504](https://www.ncbi.nlm.nih.gov/nuccore/KF907504)) were used in this  
264 study. All these viral strains are available for the scientific community via the European Virus  
265 Archive goes Global (EVAg) project, a non-profit organization ([https://www.european-virus-  
266 archive.com](https://www.european-virus-archive.com)).

267 For each viral strain, we prepared a stock solution of clarified cell culture medium which was  
268 then used for all analyses. Briefly, a 25 cm<sup>2</sup> culture flask of confluent Vero-E6 cells containing  
269 667µL medium with 2.5% FBS (Life Technologies) was inoculated with 333µL of clarified  
270 infectious medium, incubated for 6 hours, washed once with Hank's Balanced Salt Solution  
271 (HBSS, Life Technologies) and incubated for 3 days with 7mL of fresh medium. Cell  
272 supernatant medium was harvested, clarified by centrifugation, supplemented with HEPES  
273 buffer (Final concentration of 25mM; Sigma), aliquoted and stored at -80°C.



274 All experiments using replicating viruses were performed in BSL3 facilities.

275

## 276 **ISA procedure**

277 Chimeric viruses and the YFV 17-D vaccine strain were rescued using the ISA (Infectious  
278 Subgenomic Amplicons) reverse genetics method as previously described<sup>20,27,36</sup>.

### 279 Preparation of subgenomic DNA fragments

280 The complete viral genome was amplified by PCR as three overlapping DNA fragments. The  
281 first and last fragments were flanked respectively by the 5' and 3' termini and included the  
282 human cytomegalovirus promoter (pCMV) and the hepatitis delta ribozyme followed by the  
283 simian virus 40 polyadenylation signal (HDR/SV40pA). We started by using a reverse genetics  
284 system designed for the YFV 17-D strain (available on supplemental material). Because the  
285 first DNA fragment contained all regions encoding structural genes, only this fragment was  
286 modified to design chimeric viruses (the primers are listed in supplemental table 3).

287 DNA fragments were generated by PCR using *de novo* synthesized genes (Genscript) as  
288 templates. The sequence of the primers used is listed in supplemental table 2. PCR mixes were  
289 prepared using the Platinum PCR SuperMix High Fidelity kit (Life Technologies) following  
290 the manufacturer's instructions. Amplifications were performed using ABI 2720 thermal cycler  
291 (Applied Biosystems) with the following conditions: 94°C for 2 min followed by 40 cycles of  
292 94°C for 15 s, 60°C for 30 s, 68°C for 5 min plus 10 min final elongation at 68°C. PCR product  
293 size and quality were controlled by running gel electrophoresis and DNA fragments were  
294 purified using the High pure PCR product purification kit (Roche).

### 295 Cell transfection

296 Mixtures of BHK-21 and HEK-293 cells were seeded into PureCoat amine 6-well cell culture  
297 plates (Corning) one-day prior to transfection. Cells were transfected with 2µg of an equimolar  
298 mix of the three DNA fragments using lipofectamine 3000 (Life Technologies) and following  
299 the manufacturer's instructions. Each transfection was performed in 5 replicates. After 24h of  
300 incubation, the cell supernatant media were removed and replaced by fresh cell culture medium.  
301 Six days post-transfection, cell supernatant media were passaged four times using 6-well cell  
302 culture plates of confluent Vero-E6 cells: cells were inoculated with 100µL of diluted (1/3) cell  
303 supernatant media, incubated 2h, washed with HBSS and incubated six days with 3mL of  
304 medium. Remaining cell supernatant media were stored at -80°C and called passage #1, #2, #3  
305 and #4. To ensure the complete removing of DNA used during the transfection, the passage #4  
306 was used to assess virus replication: 100µL of cell supernatant medium was collected to detect

307 viral RNA using a qRT-PCR assay (see below). Passage #3 was used to produce virus stock  
308 solutions of YFV 17-D and chimeric viruses.

309

### 310 **RNA extraction and real-time quantitative PCR assays**

311 RNA extraction was performed using the Qiacube HT and the Cador pathogen extraction kit  
312 (both from Qiagen) following the manufacturer's instructions. Briefly, 100 $\mu$ l of cell supernatant  
313 medium was collected into an Sblock containing recommended quantities of VXL, proteinase  
314 K and RNA carrier. A DNase digestion step (QIAGEN) was performed to remove the DNA  
315 used during cell transfection. The quantity of viral RNA was quantified by real-time  
316 quantitative RT-PCR (qRT-PCR; EXPRESS One-Step Superscript™ qRT-PCR Kit, universal,  
317 Life Technologies). The sequence of the primers used to detect ZIKVs, YFV 17-D and chimeric  
318 viruses is listed in supplemental table 4. 3.5  $\mu$ L of RNA was used for each reaction (final  
319 volume of 10 $\mu$ L). Amplifications were performed using the QuantStudio 12K Flex Real-Time  
320 PCR System (Applied Biosystems) with the following conditions: 10 min at 50°C, 2 min at  
321 95°C, and 40 amplification cycles (95°C for 3 sec followed by 30sec at 60°C). Amounts of viral  
322 RNA were calculated from standard curves (quantified T7-generated synthetic RNA standards  
323 were used).

324

### 325 **Complete Genome sequencing**

326 Complete and partial genome sequencing of chimeric virus were performed as previously  
327 described<sup>37</sup>. Viral RNA extraction was performed as described above. A set of specific primer  
328 pairs (supplemental table 5) was used to generate amplicons by RT-PCR using the Superscript  
329 III One-Step RT-PCR Platinum TaqHifi kit (Life Technologies). For each passage sequenced,  
330 purified PCR products were pooled and analyzed using the Ion PGM Sequencer (Life  
331 technologies) according to the manufacturer's instructions. Resulting reads were analyzed using  
332 the CLC Genomics Workbench 6 software (CLC Bio). They were trimmed using quality score,  
333 by removing the primer sequences at their termini and by finally systematically removing 20 nt  
334 at the 5' and 3' termini. Remaining reads with a length greater than 99 were mapped using the  
335 designed sequence of the chimeric virus as reference to obtain a consensus sequence. Mutation  
336 frequency for each position was calculated as the number of mutated reads divided by the total  
337 number of reads at that site.

### 338 **Tissue culture infectious dose 50 (TCID50) assay**

339 96-well cell culture plate of confluent Vero-E6 containing 100 $\mu$ L/well of media was inoculated  
340 (50 $\mu$ L/well) with 10-fold serial dilutions of centrifugation clarified cell culture supernatant

341 medium. Each dilution was repeated 6 times. The plate was incubated for 7 days and read for  
342 absence or presence of CPE in each well. TCID50 titers were then calculated using the Reed-  
343 Muench method <sup>38</sup>.

344

#### 345 **Cell Viability assay.**

346 Confluent cells were inoculated at an MOI (multiplicity of infection) of 0.01 in a 96-well cell  
347 culture plate in triplicate for each measurement day. Every day for a period of 5 days we  
348 performed the cell titer blue viability assay (Promega) following the manufacturer's  
349 instructions.

350

#### 351 **Virus growth kinetics**

352 Confluent cells were inoculated at an MOI of 0.01 in a 6-well cell culture plate in triplicate.  
353 Every day for a period of 7 days, 100 $\mu$ L of cell supernatant medium was collected to measure  
354 amounts of viral RNA by qRT-PCR (see above) and 200 $\mu$ l for TCID50.

355

#### 356 **Indirect immunofluorescence assay**

357 Confluent Vero-E6 cells were inoculated at an MOI of 0.01 in an 8-well cell culture in Lab-Tek  
358 II Chamber Slide System in duplicate. At 2 and 5 days post-infection, cells were washed twice  
359 with HBSS and fixed with 4% paraformaldehyde for 2 hours. Detection of viral antigens was  
360 performed as previously described<sup>20,39</sup> using a specific ZIKV immune serum as the primary  
361 antibody (dilution: 1/50) collected from a Syrian Hamster immunized with the ZIKV strain  
362 Mart2015 (see below). This serum was shown to neutralize more than 90 % of ZIKV PF  
363 replication until 1/3000 dilution (data not shown). The secondary antibody used was a Goat  
364 anti-hamster Alexa 488 antibody (Invitrogen) at 1/500 dilution. Slides were observed using a  
365 Eurostar II fluorescence microscope with the Europicture software (Euroimmune).

366

#### 367 **Viral RNA Yield Reduction Neutralization Test (YRNT)**

368 Vero-E6 cells were seeded into a 96-well cell culture plate one day prior to infection ( $5 \times 10^4$   
369 cells in 100 $\mu$ L of medium containing 2.5% FBS per well). The next day, two fold serial  
370 dilutions of sera (from 1/20 to 2560; diluted with medium containing 2.5% FBS) were mixed  
371 (50:50; v/v) with appropriate amounts of viral stock (diluted in medium containing 2.5% FBS),  
372 incubated 1h 30 min. at 37°C/5%CO<sub>2</sub> and then added to cells (50 $\mu$ L/well). The amount of virus

373 added had been calibrated to ensure that virus production in cell supernatant medium did not  
374 reach a plateau at the readout time<sup>40</sup>. Cells were incubated for 3 days and 100µL of cell  
375 supernatant medium was harvested to perform nucleic acid extraction and to quantify amounts  
376 of viral RNA using a real-time qRT-PCR assay (see above). Each serum dilution was tested in  
377 triplicate and duplicate for the control group. For each experiment, a virus replication control  
378 (VC) was performed in quadruplicate to assess viral replication. For each serum dilution, viral  
379 RNA yield reduction (% of viral inhibition) was calculated using as reference the mean amount  
380 of viral RNA obtained with VC. 50% and 90% viral inhibition cut-offs were used to estimate  
381 'viral RNA Yield Reduction Neutralization 50% and 90% (YRNT50 ; YRNT90) titers using  
382 the method of Reed and Muench<sup>38</sup>.

383

## 384 ***In vivo* experiments**

### 385 Ethics statement

386 Animal protocols had been approved by the local ethics committee (Comité d'éthique en  
387 expérimentation animale de Marseille - C2EA -14; protocol number #9327). All *in vivo*  
388 experiments were performed in accordance with the European legislation covering the use of  
389 animals for scientific purposes (Directive 210/63/EU) and French national guidelines.

### 390 Animal handling

391 Animals were maintained in ISOcage P Bioexclusion System (Techniplast) with unlimited  
392 access to food and water and 12h-light/12h-dark cycle. Animals were individually monitored  
393 every day to detect appearance of any clinical sign of illness/suffering. Virus/Antibody  
394 inoculation, blood collection as well as euthanasia (cervical dislocation) were performed under  
395 general anesthesia (isoflurane).

### 396 Golden hamster immunization

397 One 4-weeks-old female Syrian Hamster (Janvier) was intra-peritoneally immunized with  
398 100µL containing 10<sup>5</sup> TCID<sub>50</sub> of ZIKV strain Mart2015. 21 days later the Hamster was re-  
399 injected with the same dose. The hamster did not show any sign of illness or weight loss. 15  
400 days later, the hamster was euthanized and a blood sample (intracardiac puncture) was  
401 collected. After centrifugation, serum was stored at -80°C.

### 402 Administration of anti-IFNAR antibody

403 All the mice used were immunocompromised following a two-step inoculation of anti-IFNAR  
404 antibody (clone MAR1-5A3; Interchim; intraperitoneal injection ; 120µL)<sup>23,25</sup>: 1mg one day

405 prior and 1 mg one day after each infection/immunization (*i.e.* the mice challenged were  
406 immunocompromised twice with this two-step procedure).

#### 407 Mice immunization

408 Six groups of four 3-weeks-old female C57/bl6 mice (Charles River) were intraperitoneally  
409 inoculated with 100 $\mu$ L of virus: two groups were immunized with the YFV 17-D strain (two  
410 dosages: 10<sup>4</sup> and 10<sup>5</sup> TCID<sub>50</sub>), two groups were immunized with the ZIKV PF strain (two  
411 dosages: 10<sup>5</sup> and 10<sup>6</sup> TCID<sub>50</sub>) and two groups were immunized with the CH-17-D/ZIKV strain  
412 (two dosages: 10<sup>4</sup> and 10<sup>5</sup> TCID<sub>50</sub>). A control group of four mice was used as negative control  
413 group (non-immunized mice).

414 Blood collection (10 $\mu$ L) from the tail vein was performed at days 2 and 3 post-immunization  
415 to detect infectious virus by cell culture isolation. Immediately after its collection, all the blood  
416 was inoculated into a 12-well cell culture plate containing confluent Vero-E6 cells and 150 $\mu$ L  
417 of medium/well. After an incubation of 2 hours, 100 $\mu$ L of the inoculum was harvested. The  
418 cells were washed (HBSS), 1.5mL/well of fresh medium was added to the cells which were  
419 incubated for 6 days. Finally, 100 $\mu$ L of cell supernatant medium was harvested to perform  
420 nucleic acid extraction and to quantify amounts of viral RNA using a real-time qRT-PCR assay  
421 as described above.

422 At day 21 post-infection, all animals were euthanized. Blood samples were then collected  
423 (intracardiac puncture) from euthanized animals. After blood centrifugation, sera were stored  
424 at -80°C before being used to perform the neutralization tests.

#### 425 Challenge experiments

426 Five groups of four 3-weeks-old female C57/bl6 mice (Charles River) were intraperitoneally  
427 inoculated with 100 $\mu$ L of virus: two groups were immunized with the YFV 17-D strain (two  
428 dosages: 10<sup>4</sup> and 10<sup>5</sup> TCID<sub>50</sub>), two groups were immunized with the CH-17-D/ZIKV strain  
429 (two dosages: 10<sup>4</sup> and 10<sup>5</sup> TCID<sub>50</sub>), and one group was immunized mice with the ZIKV PF  
430 strain (10<sup>5</sup> TCID<sub>50</sub>). Two control groups of 4 mice were used to perform (i) mock control group  
431 (non-immunized/non-challenged mice); and (ii) negative control group (non-immunized mice;  
432 challenged).

433 All animals (except mock control group) were then challenged with 10<sup>6</sup> TCID<sub>50</sub> of ZIKV  
434 Dak84. Blood collection (10 $\mu$ L) from the tail vein was performed at days 2 and 3 post-challenge  
435 to assess viremia by qRT-PCR. At day 10 post-challenge, all the animals were euthanized.  
436 Organs (spleen and brain) were then collected in 1 mL of HBSS supplemented with 10% of  
437 FBS and crushed 10 minutes at 30 cycles per second with one bead of tungsten using the Tissue  
438 Lyser machine (Retsch MM400). After centrifugation at 5000g during 10 min, the supernatant  
439 medium was collected centrifuged again at 10,000g for 10 min. 50  $\mu$ L of the supernatant

440 medium was used to perform nucleic acid extraction and to quantify amounts of viral RNA  
441 using a real-time qRT-PCR assay (see above).

## 442 **Statistical analysis**

443 All data obtained were analyzed using Graph pad prism 7 software (Graph pad software). All  
444 graphical representations and statistical analyses were also performed on Graph pad prism 7  
445 software.

446

447

## 448 **Acknowledgements**

449 We thank Ernest A Gould from the UMR UVE (Marseille, France) for his valuable review of  
450 the manuscript. We also thank Geraldine Piorkowski and Karine Barthelemy from the UMR  
451 UVE (Marseille, France) for all the viral sequencing. This work was supported by the French  
452 “Agence Nationale de la Recherche” (grant agreement no. ANR-14-CE14-0001) and the  
453 European Virus Archive goes global project (EVAg; European Union – Horizon 2020  
454 programme under grant agreement no. 653316; <http://www.european-virus-archive.com/>).

455

## 456 **Conflict of interests**

457 The authors declare no competing interests.

458

## 459 **Contributions**

460 FT, XDL and AN conceived the experiments. XDL allowed the funding of this study. FT, MG,  
461 FA and RK performed the experiments. FT, MG, FA, RK and AN analyzed the results. FT, MG  
462 and AN wrote the paper. FA, RK and XDL reviewed and edited the paper.

463

## 464 **References**

- 465 1 Ye Q, Liu Z-Y, Han J-F, Jiang T, Li X-F, Qin C-F. Genomic characterization and  
466 phylogenetic analysis of Zika virus circulating in the Americas. *Infect Genet Evol* 2016; **43**:  
467 43–49.
- 468 2 Pettersson JH-O, Eldholm V, Seligman SJ *et al.* How Did Zika Virus Emerge in the Pacific  
469 Islands and Latin America? doi:10.1128/mBio.01239-16.
- 470 3 Gould E, Pettersson J, Higgs S, Charrel R, de Lamballerie X. Emerging arboviruses: Why  
471 today? *One Health* 2017; **4**: 1–13.



- 472 4 Duffy MR, Chen T-H, Hancock WT *et al.* Zika virus outbreak on Yap Island, Federated  
473 States of Micronesia. *N Engl J Med* 2009; **360**: 2536–2543.
- 474 5 Cao-Lormeau V-M, Blake A, Mons S *et al.* Guillain-Barré Syndrome outbreak associated  
475 with Zika virus infection in French Polynesia: a case-control study. *The Lancet* 2016; **387**:  
476 1531–1539.
- 477 6 de Oliveira WK, Carmo EH, Henriques CM *et al.* Zika Virus Infection and Associated  
478 Neurologic Disorders in Brazil. *N Engl J Med* 2017; **376**: 1591–1593.
- 479 7 Kaptein SJ, Neyts J. Towards antiviral therapies for treating dengue virus infections. *Curr*  
480 *Opin Pharmacol* 2016; **30**: 1–7.
- 481 8 Larocca RA, Abbink P, Peron JPS *et al.* Vaccine Protection Against Zika Virus from Brazil.  
482 *Nature* 2016; **536**: 474–478.
- 483 9 Tebas P, Roberts CC, Muthumani K *et al.* Safety and Immunogenicity of an Anti-Zika  
484 Virus DNA Vaccine - Preliminary Report. *N Engl J Med* 2017.  
485 doi:10.1056/NEJMoa1708120.
- 486 10 Pardi N, Hogan MJ, Pelc RS *et al.* Zika virus protection by a single low-dose nucleoside-  
487 modified mRNA vaccination. *Nature* 2017; **543**: 248–251.
- 488 11 Minor PD. Live attenuated vaccines: Historical successes and current challenges. *Virology*  
489 2015; **479–480**: 379–392.
- 490 12 Shan C, Muruato AE, Nunes BT *et al.* A live-attenuated Zika virus vaccine candidate  
491 induces sterilizing immunity in mouse models. *Nat Med* 2017; **23**: 763–767.
- 492 13 Durbin A, Wilder-Smith A. An update on Zika vaccine developments. *Expert Rev Vaccines*  
493 2017; **16**: 781–787.
- 494 14 Li X-F, Dong H-L, Wang H-J *et al.* Development of a chimeric Zika vaccine using a  
495 licensed live-attenuated flavivirus vaccine as backbone. *Nat Commun* 2018; **9**.  
496 doi:10.1038/s41467-018-02975-w.
- 497 15 Monath TP, McCarthy K, Bedford P *et al.* Clinical proof of principle for ChimeriVax:  
498 recombinant live, attenuated vaccines against flavivirus infections. *Vaccine* 2002; **20**:  
499 1004–1018.
- 500 16 Arroyo J, Miller C, Catalan J *et al.* ChimeriVax-West Nile virus live-attenuated vaccine:  
501 preclinical evaluation of safety, immunogenicity, and efficacy. *J Virol* 2004; **78**: 12497–  
502 12507.
- 503 17 Scott LJ. Tetravalent Dengue Vaccine: A Review in the Prevention of Dengue Disease.  
504 *Drugs* 2016; **76**: 1301–1312.
- 505 18 Chin R, Torresi J. Japanese B Encephalitis: An Overview of the Disease and Use of  
506 Chimerivax-JE as a Preventative Vaccine. *Infect Dis Ther* 2013; **2**: 145–158.
- 507 19 Scott LJ. Tetravalent Dengue Vaccine: A Review in the Prevention of Dengue Disease.  
508 *Drugs* 2016; **76**: 1301–1312.

- 509 20 Aubry F, Nougairède A, de Fabritus L, Querat G, Gould EA, de Lamballerie X. Single-  
510 stranded positive-sense RNA viruses generated in days using infectious subgenomic  
511 amplicons. *J Gen Virol* 2014; **95**: 2462–2467.
- 512 21 Sirohi D, Chen Z, Sun L *et al.* The 3.8Å resolution cryo-EM structure of Zika Virus. *Science*  
513 2016; **352**: 467–470.
- 514 22 Govero J, Esakky P, Scheaffer SM *et al.* Zika virus infection damages the testes in mice.  
515 *Nature* 2016; **540**: 438–442.
- 516 23 Lazear HM, Govero J, Smith AM *et al.* A Mouse Model of Zika Virus Pathogenesis. *Cell*  
517 *Host Microbe* 2016; **19**: 720–730.
- 518 24 Sheehan KCF, Lai KS, Dunn GP *et al.* Blocking Monoclonal Antibodies Specific for Mouse  
519 IFN- $\alpha/\beta$  Receptor Subunit 1 (IFNAR-1) from Mice Immunized by In Vivo Hydrodynamic  
520 Transfection. *J Interferon Cytokine Res* 2006; **26**: 804–819.
- 521 25 Heinz FX, Stiasny K. The Antigenic Structure of Zika Virus and Its Relation to Other  
522 Flaviviruses: Implications for Infection and Immunoprophylaxis. *Microbiol Mol Biol Rev*  
523 2017; **81**: e00055-16.
- 524 26 Atieh T, Baronti C, de Lamballerie X, Nougairède A. Simple reverse genetics systems for  
525 Asian and African Zika viruses. *Sci Rep* 2016; **6**: 39384.
- 526 27 Xie X, Yang Y, Muruato AE *et al.* Understanding Zika Virus Stability and Developing a  
527 Chimeric Vaccine through Functional Analysis. *mBio* 2017; **8**: e02134-16.
- 528 28 Pugachev KV, Guirakhoo F, Ocran SW *et al.* High Fidelity of Yellow Fever Virus RNA  
529 Polymerase. *J Virol* 2004; **78**: 1032–1038.
- 530 29 Monath TP, Arroyo J, Levenbook I *et al.* Single Mutation in the Flavivirus Envelope  
531 Protein Hinge Region Increases Neurovirulence for Mice and Monkeys but Decreases  
532 Viscerotropism for Monkeys: Relevance to Development and Safety Testing of Live,  
533 Attenuated Vaccines. *J Virol* 2002; **76**: 1932–1943.
- 534 30 Barrett PN, Mundt W, Kistner O, Howard MK. Vero cell platform in vaccine production:  
535 moving towards cell culture-based viral vaccines. *Expert Rev Vaccines* 2009; **8**: 607–618.
- 536 31 Bradley MP, Nagamine CM. Animal Models of Zika Virus. *Comp Med* 2017; **67**: 242–252.
- 537 32 Monath TP, Guirakhoo F, Nichols R *et al.* Chimeric live, attenuated vaccine against  
538 Japanese encephalitis (ChimeriVax-JE): phase 2 clinical trials for safety and  
539 immunogenicity, effect of vaccine dose and schedule, and memory response to challenge  
540 with inactivated Japanese encephalitis antigen. *J Infect Dis* 2003; **188**: 1213–1230.
- 541 33 Live virus vaccines based on a yellow fever vaccine backbone: Standardized template with  
542 key considerations for a risk/benefit assessment - ScienceDirect. [https://www-](https://www-sciencedirect-com.gate2.inist.fr/science/article/pii/S0264410X14013644?via%3Dihub)  
543 [sciencedirect-com.gate2.inist.fr/science/article/pii/S0264410X14013644?via%3Dihub](https://www-sciencedirect-com.gate2.inist.fr/science/article/pii/S0264410X14013644?via%3Dihub)  
544 (accessed 13 Jul2018).

- 545 34 Martín-Acebes MA, Saiz J-C, Jiménez de Oya N. Antibody-Dependent Enhancement and  
546 Zika: Real Threat or Phantom Menace? *Front Cell Infect Microbiol* 2018; **8**.  
547 doi:10.3389/fcimb.2018.00044.
- 548 35 Blight KJ, McKeating JA, Rice CM. Highly Permissive Cell Lines for Subgenomic and  
549 Genomic Hepatitis C Virus RNA Replication. *J Virol* 2002; **76**: 13001–13014.
- 550 36 Aubry F, Nougairède A, de Fabritus L, Piorkowski G, Gould EA, de Lamballerie X. ‘ISA-  
551 Lation’ of Single-Stranded Positive-Sense RNA Viruses from Non-Infectious  
552 Clinical/Animal Samples. *PloS One* 2015; **10**: e0138703.
- 553 37 Atieh T, Nougairède A, Klitting R *et al.* New reverse genetics and transfection methods to  
554 rescue arboviruses in mosquito cells. *Sci Rep* 2017; **7**. doi:10.1038/s41598-017-14522-6.
- 555 38 Reed LJ, Muench H. A SIMPLE METHOD OF ESTIMATING FIFTY PER CENT  
556 ENDPOINTS. *Am J Epidemiol* 1938; **27**: 493–497.
- 557 39 Touret F, Guiguen F, Terzian C. Wolbachia Influences the Maternal Transmission of the  
558 gypsy Endogenous Retrovirus in *Drosophila melanogaster*. *mBio* 2014; **5**: e01529-14-  
559 e01529-14.
- 560 40 Delang L, Li C, Tas A *et al.* The viral capping enzyme nsP1: a novel target for the inhibition  
561 of chikungunya virus infection. *Sci Rep* 2016; **6**. doi:10.1038/srep31819.
- 562
- 563

564 **Figure legends**

565

566 **Figure 1 Schematic representation of design and recovery strategies used to generate**  
567 **chimeric viruses. We recovered infectious virus with construct C only.**

568 The two cleavage sites are enlarge in boxes with the amino acid alignment represented with  
569 separation between different proteins.

570

571 **Figure 2: Evolution of viral production of chimeric viruses during serial passage that**  
572 **followed cell transfection**

573 A mix of BHK-21/HEK-293 cells was transfected. Cell supernatant media were then passaged  
574 4-8 times in Vero-E6 cells. Viral production in cell supernatant medium was assessed using a  
575 real time quantitative RT-PCR assay.

576

577 **Figure 3 : CH-17-D/ZIKV *in cellulo* characterization**

578 **Panel A:** Expression of the ZIKV E protein in Vero-E6 was confirmed at day 2 and 5 post-  
579 infection using an indirect immunofluorescence assay using a specific ZIKV immune serum as  
580 the primary antibody. Uninfected cells (mock) and cells infected by ZIKV and the 17-D vaccine  
581 strain were used as controls. **Panel B/C/D:** Comparative growth kinetics of CH-17-D/ZIKV,  
582 ZIKV 17-D vaccine strains HUH 7.5 (**B**), HEK-293 (**C**) and Vero E-6 (**D**). **Panel E/F:**  
583 Comparative growth kinetics of CH-17-D/ZIKV, ZIKV 17-D vaccine strains in Vero cells. Cell  
584 supernatant media were harvested at different time points after infection to assess the amount  
585 of viral RNA using a real time quantitative RT-PCR assay (**panel E**; expressed as mean  $\pm$ SD)  
586 and the infectious titers using a TCID<sub>50</sub> assay (**panel F**; expressed as mean  $\pm$ SD).

587

588 **Figure 4 Neutralizing antibody titers of transitory immunocompromised mice at day 21**  
589 **post-immunization**

590 **Panel A:** Experimental timeline. **Panel B/C:** Groups of four mice were immunized with two  
591 doses of CH-17-D/ZIKV, ZIKV and the 17-D vaccine strain (from 10e4 to 10e6 TCID<sub>50</sub>).  
592 Twenty-one days later, sera from mice were tested for the presence of antibodies to ZIKV and  
593 YFV using a viral RNA Yield Reduction Neutralization Test. Results are expressed as  
594 individual log of YRNT50 (**Panel B**) and YRNT90 titers (**Panel C**) with mean values  $\pm$ SD  
595 represented respectively by black lines and error-bars.

596

597

598

599 **Figure 5 Amounts of viral RNA detected in brain and spleen samples collected during**  
600 **challenge experiments**

601 **Panel A:** Experimental timeline. **Panel B:** Amounts of viral RNA in brain and spleen samples  
602 collected during challenge experiments (cf. Table 2) measured using a real time quantitative  
603 RT-PCR assay. Mean values  $\pm$ SD are represented respectively by black lines and error-bars.  
604 Results from both doses of viruses are pooled.

605 **Tables**

606 **Table 1: Mutations detected during the passages that followed cell transfection of**  
 607 **chimeric viruses.**

608 Only consensus mutations (frequency >50%) are shown. **n.a.**: not available; **n.d.**: not detected

609

| Chimeric virus       | Nucleotide position | Frequency at #P2 | Frequency at #P4 | Frequency at #P8 | Frequency at #P10 | Region | Nucleotide change | aa change |
|----------------------|---------------------|------------------|------------------|------------------|-------------------|--------|-------------------|-----------|
| <b>CH-17-D/ZIKV</b>  | 291                 | 100%             | 100%             | 100%             | 100%              | C      | A>G               | -         |
|                      | 1625                | 66%              | 90%              | 92%              | 94%               | E      | T>C               | V>A       |
|                      | 1706                | 100%             | 100%             | 100%             | 100%              | E      | G>T               | G>V       |
|                      | 2514                | 100%             | 100%             | 100%             | 79%               | NS1    | A>G               | -         |
|                      | 4482                | 100%             | 100%             | 100%             | 100%              | NS2B   | A>G               | -         |
| <b>CH-17-D/ZIKV*</b> | 291                 | n.a              | n.d              | 70%              | n.a               | C      | A>G               | -         |
|                      | 1303                | n.a              | 100%             | n.d              | n.a               | E      | C>T               | H>Y       |
|                      | 1625                | n.a              | n.d              | 68%              | n.a               | E      | T>C               | V>A       |
|                      | 1706                | n.a              | n.d              | 69%              | n.a               | E      | G>T               | G>V       |
|                      | 2514                | n.a              | n.d              | 69%              | n.a               | NS1    | A>G               | -         |
|                      | 4482                | n.a              | n.a              | 56%              | n.a               | NS2B   | A>G               |           |

610

611



612 **Table 2: Protection of transitory immunocompromised mice challenged with a**  
613 **heterologous strain of ZIKV**

614 Groups of mice were immunized with two doses (10e4 and 10e5 TCID<sub>50</sub>) of CH-17-D/ZIKV,  
615 the 17-D vaccine strain or PBS (unvaccinated). Twenty-one days later, mice were challenged  
616 with 10e6 TCID<sub>50</sub> of a ZIKV African strain. The proportion of mice with positive spleen/brain  
617 at day 10 post-challenge was expressed as percentage. Results from both doses of viruses are  
618 pooled (results for each group are in supplemental Table 2). Detection of viral RNA was  
619 assessed using a real time RT-PCR assay. Amounts of viral RNA detected in samples are  
620 represented in figure 5.

621

| <b>Viral strain</b>                     | <b>Spleens</b> | <b>Brains</b> |
|-----------------------------------------|----------------|---------------|
| <b>CH-17D/ZIKV (both doses)</b>         | 10% (1/10)     | 10% (1/10)    |
| <b>17-D vaccine strain (both doses)</b> | 100 % (8/8)    | 87,5% (7/8)   |
| <b>Unvaccinated</b>                     | 100% (4/4)     | 100% (4/4)    |
| <b>ZIKV PF</b>                          | 0% (0/4)       | 0% (0/4)      |

622

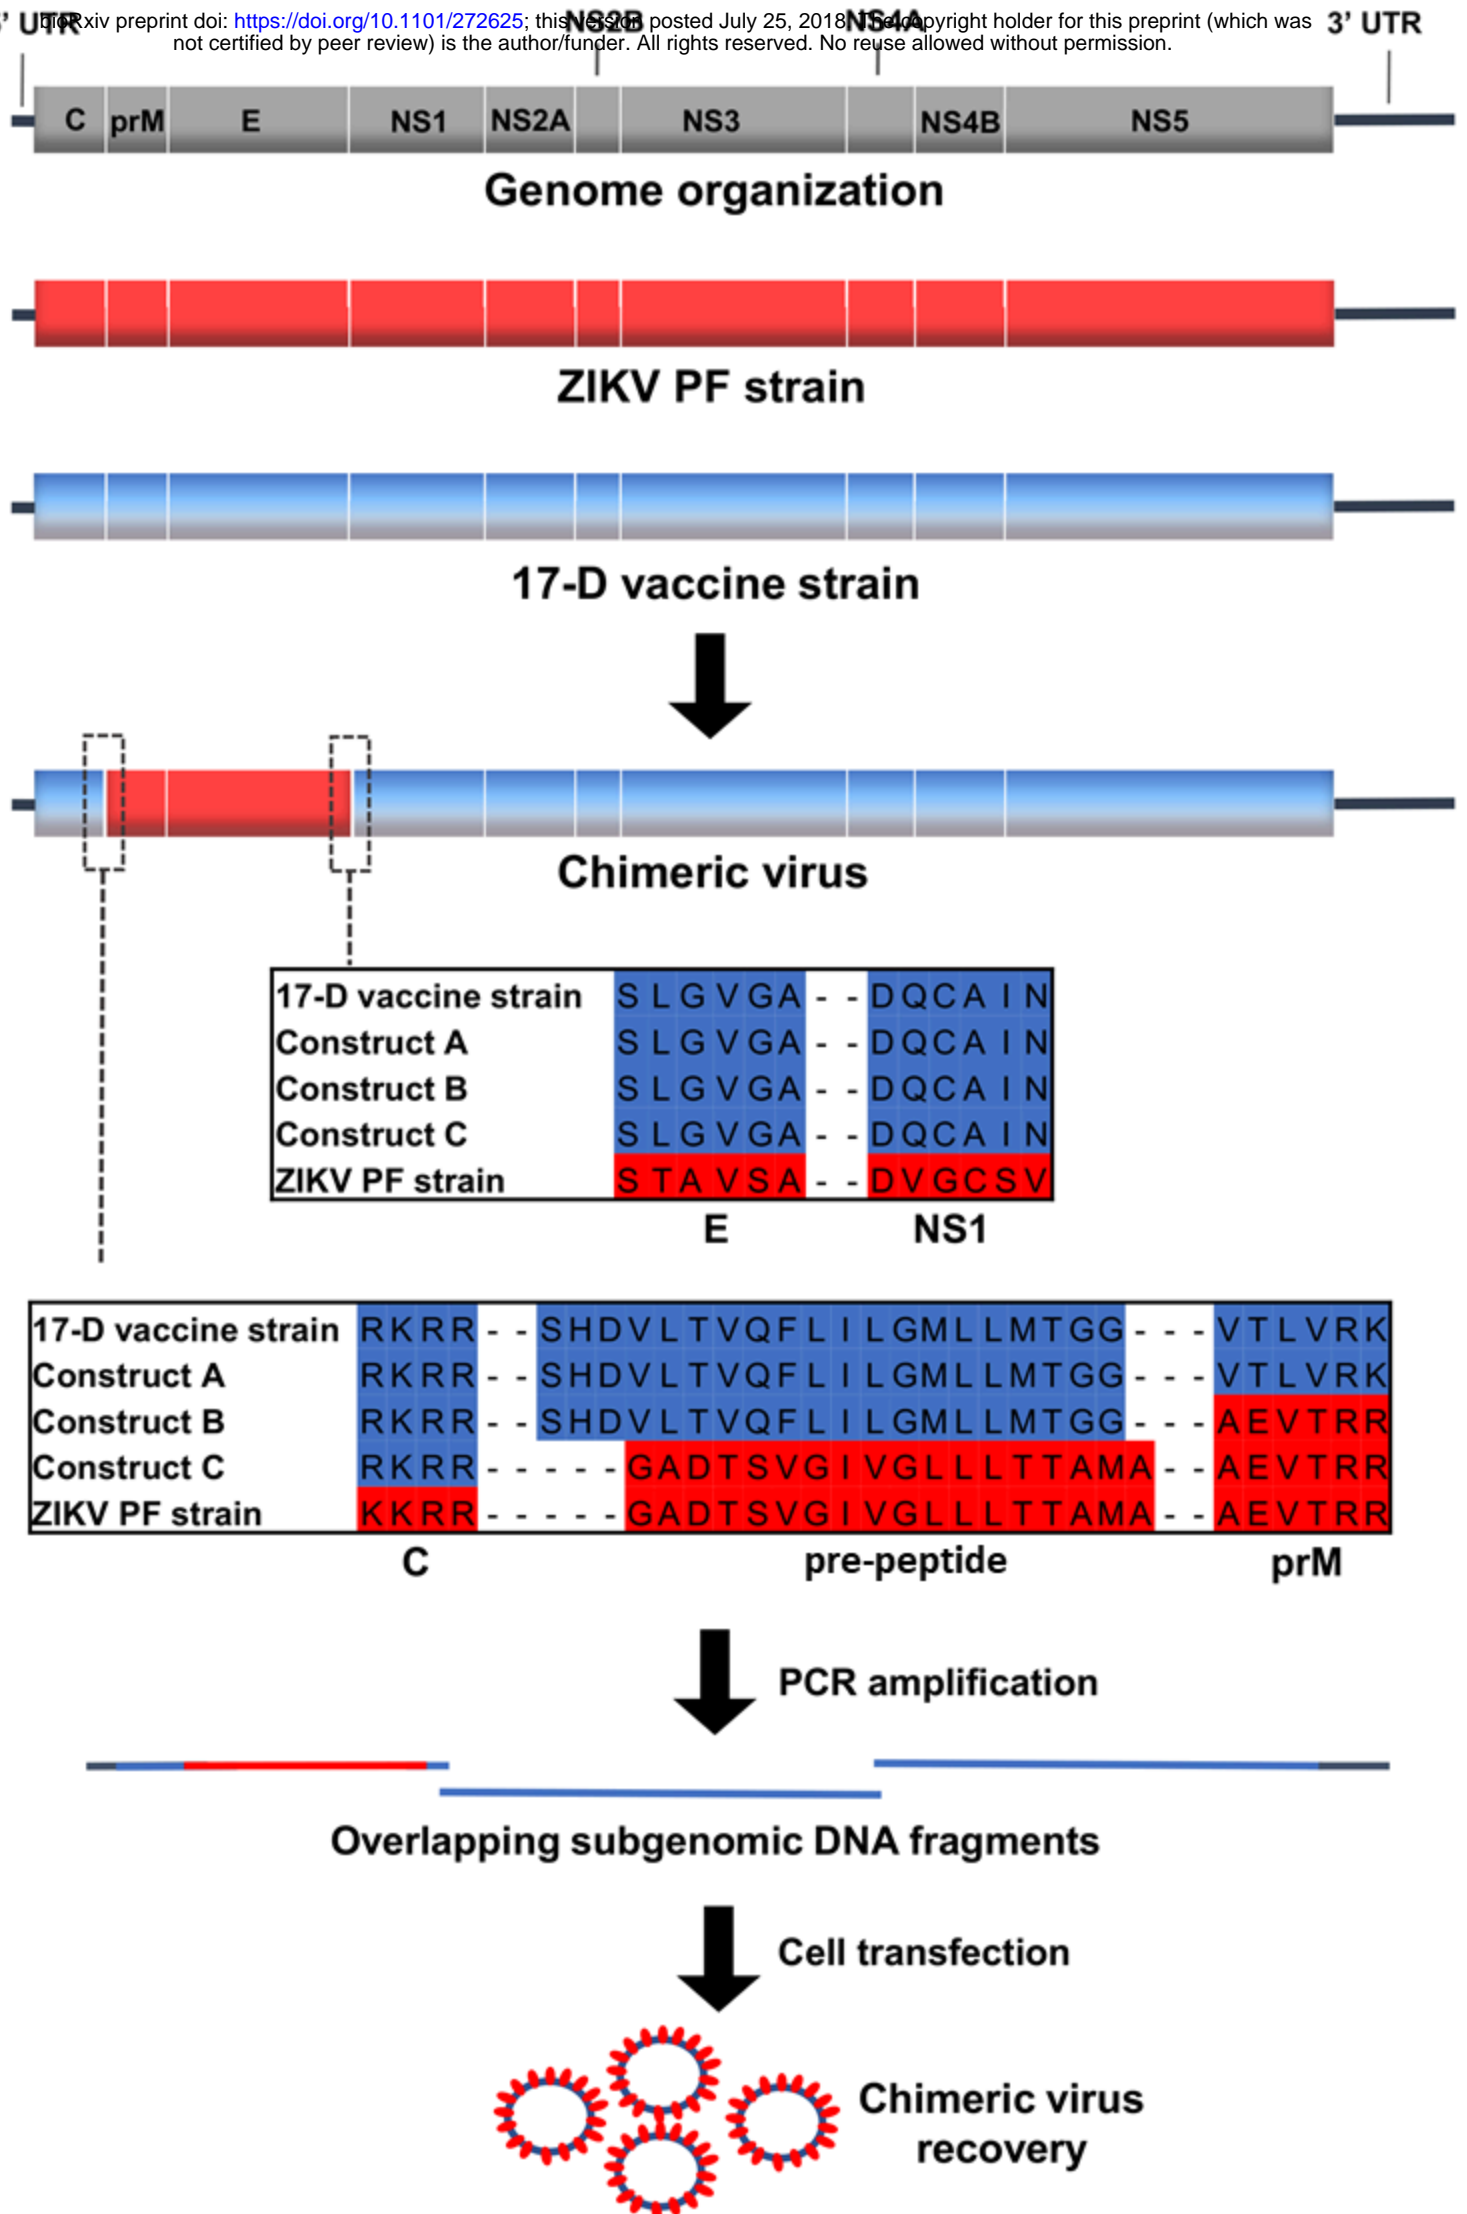

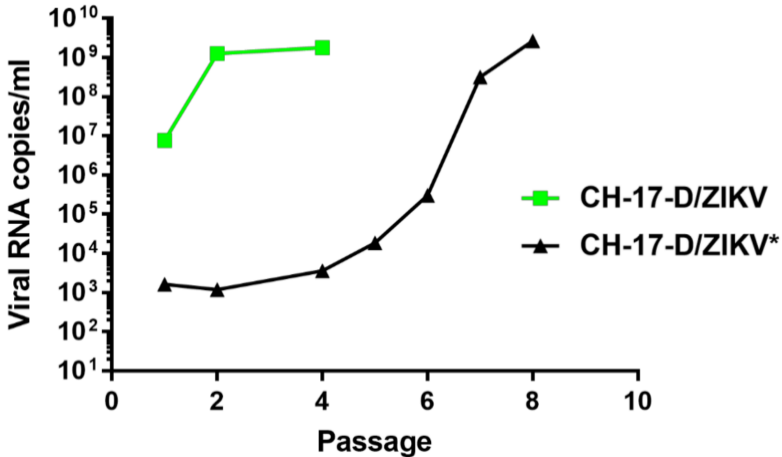

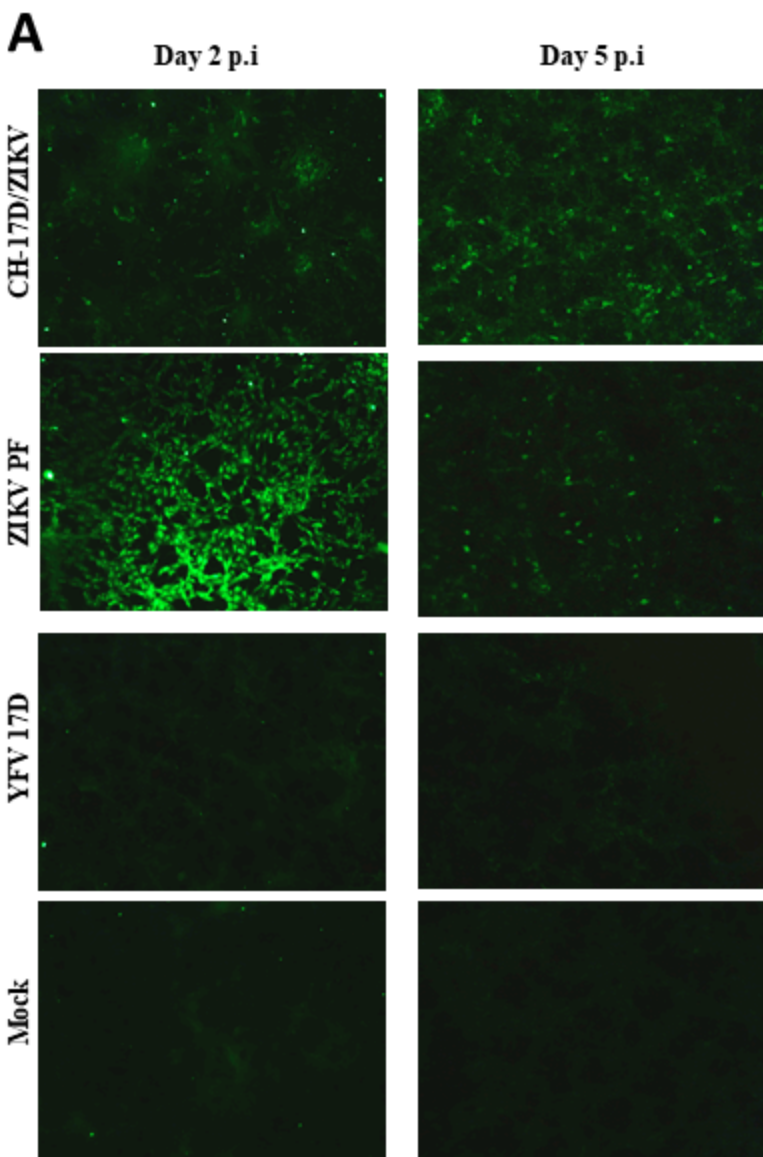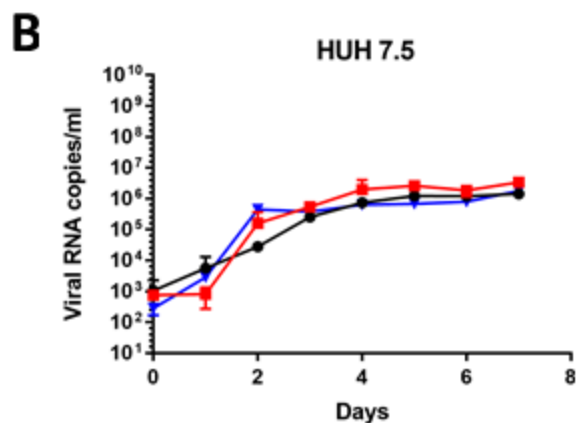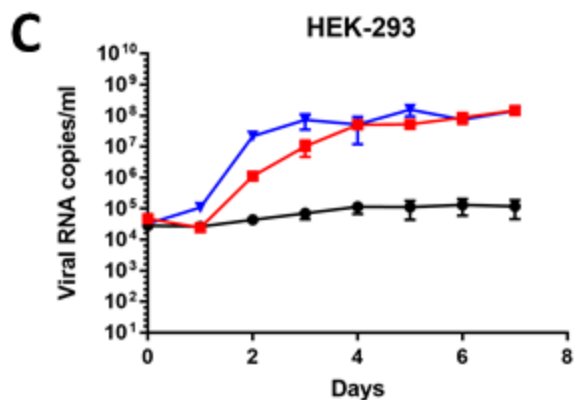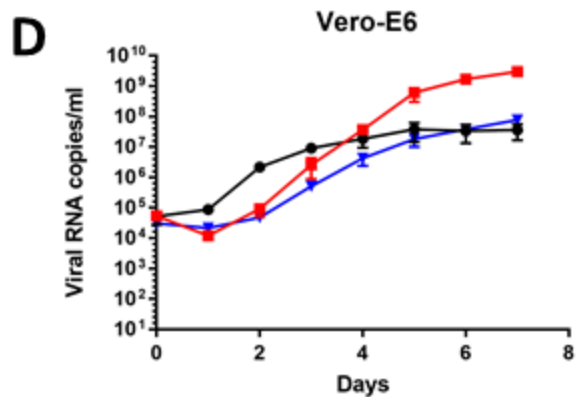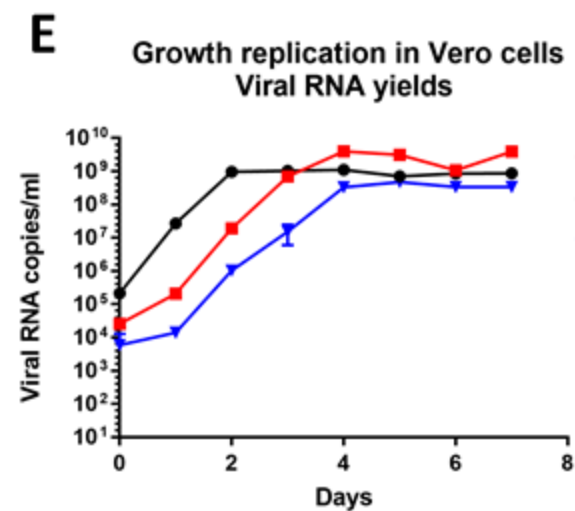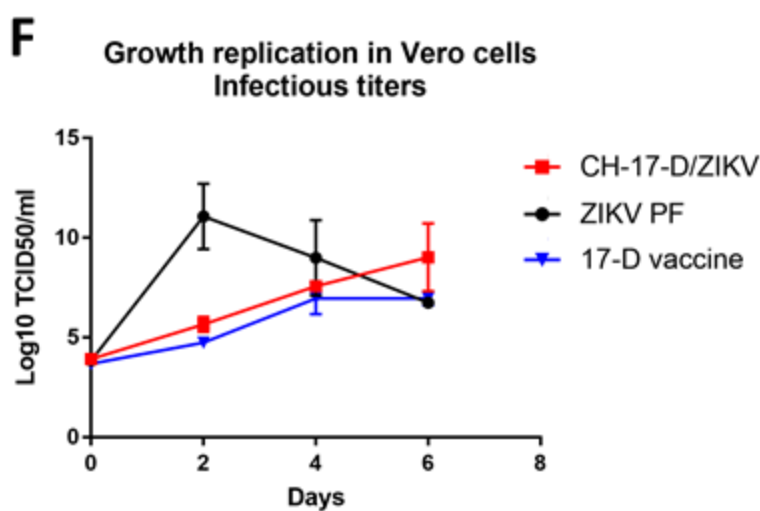

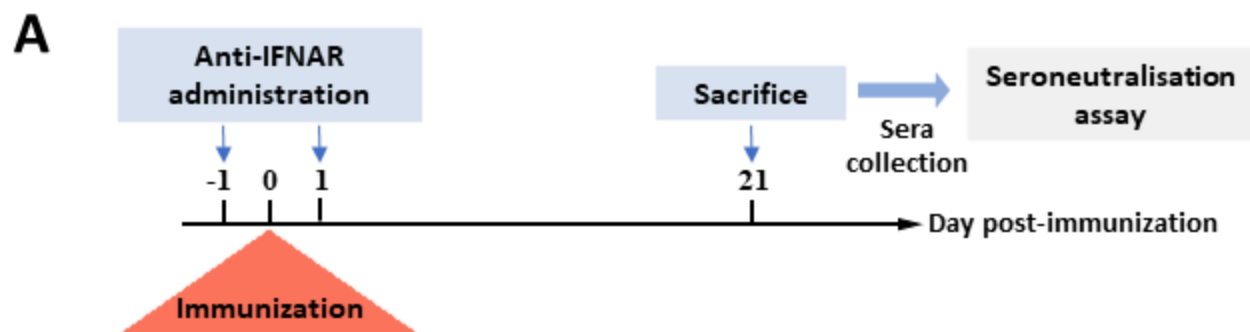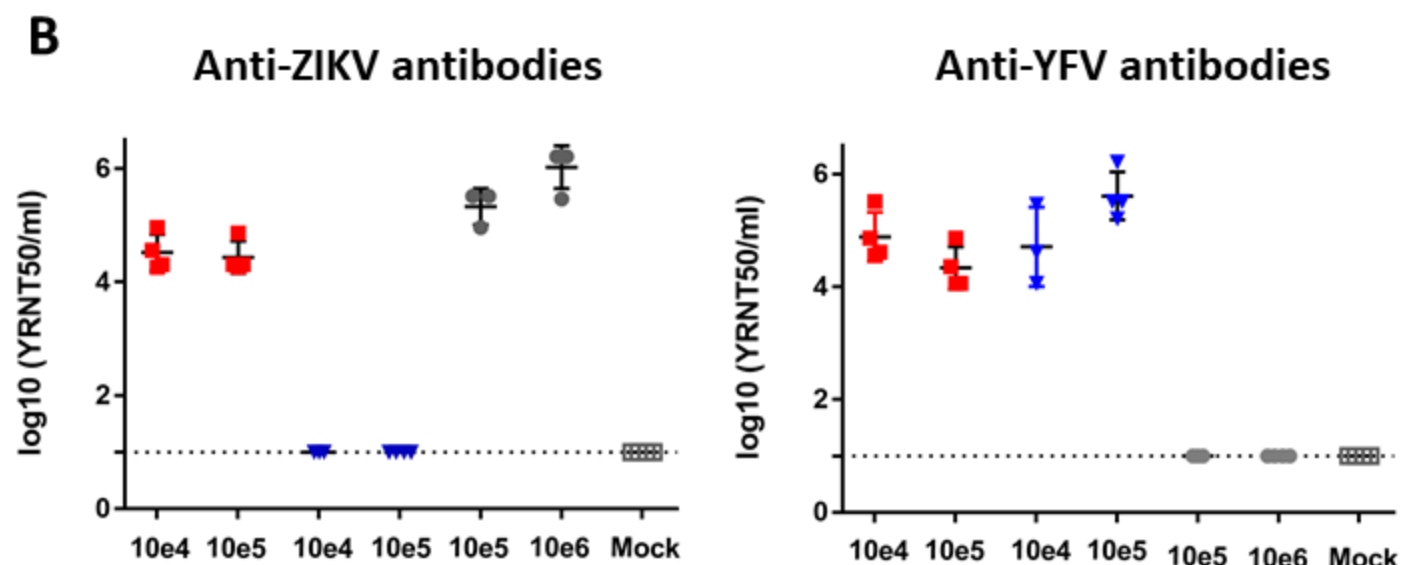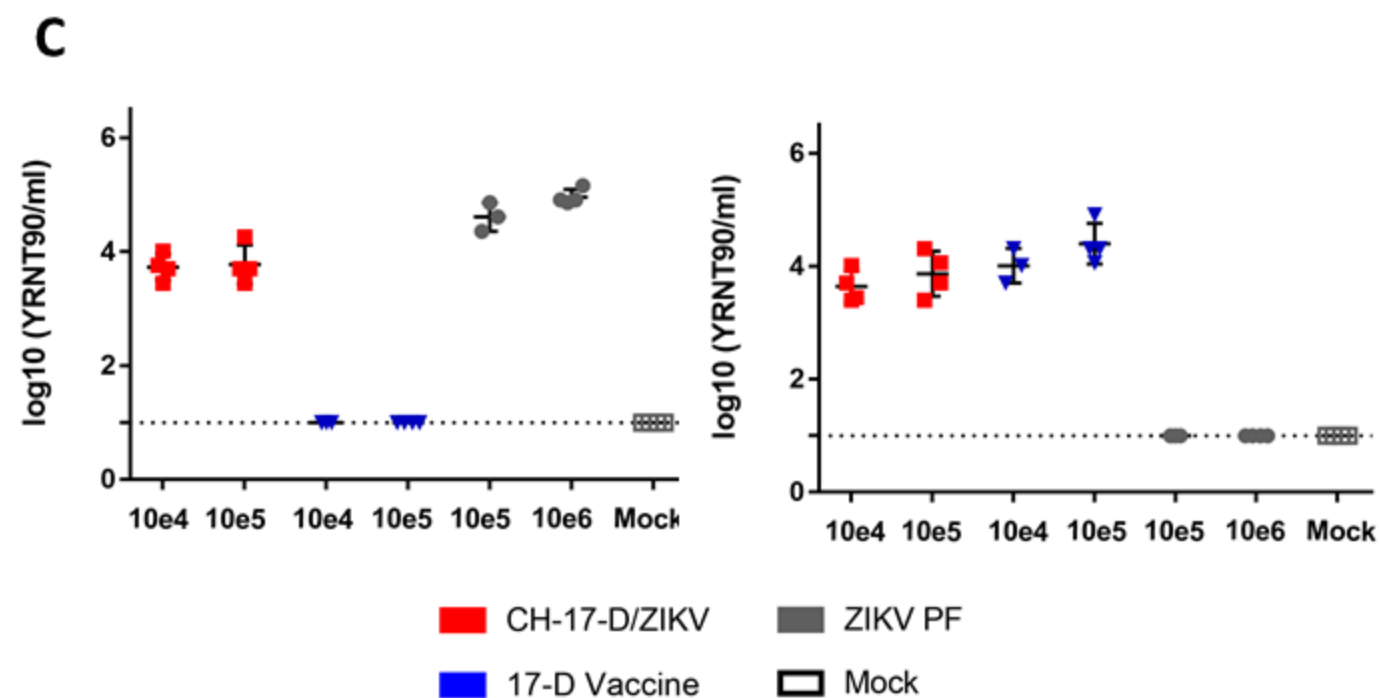

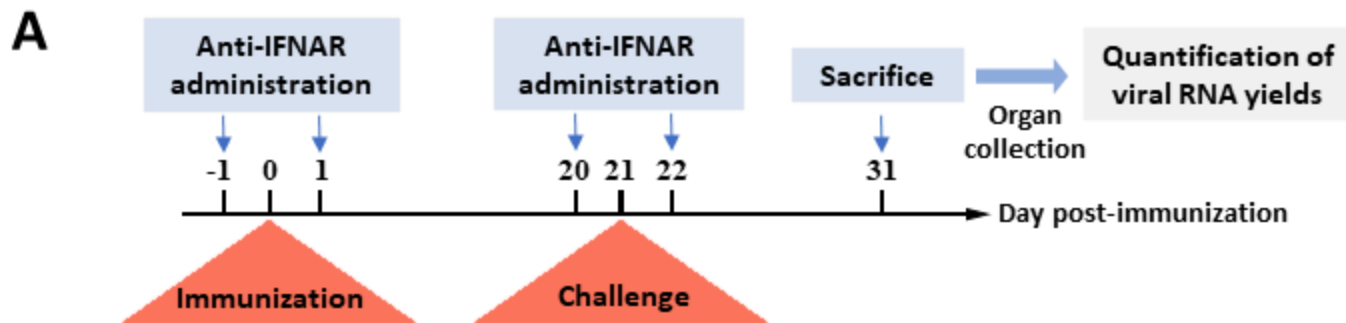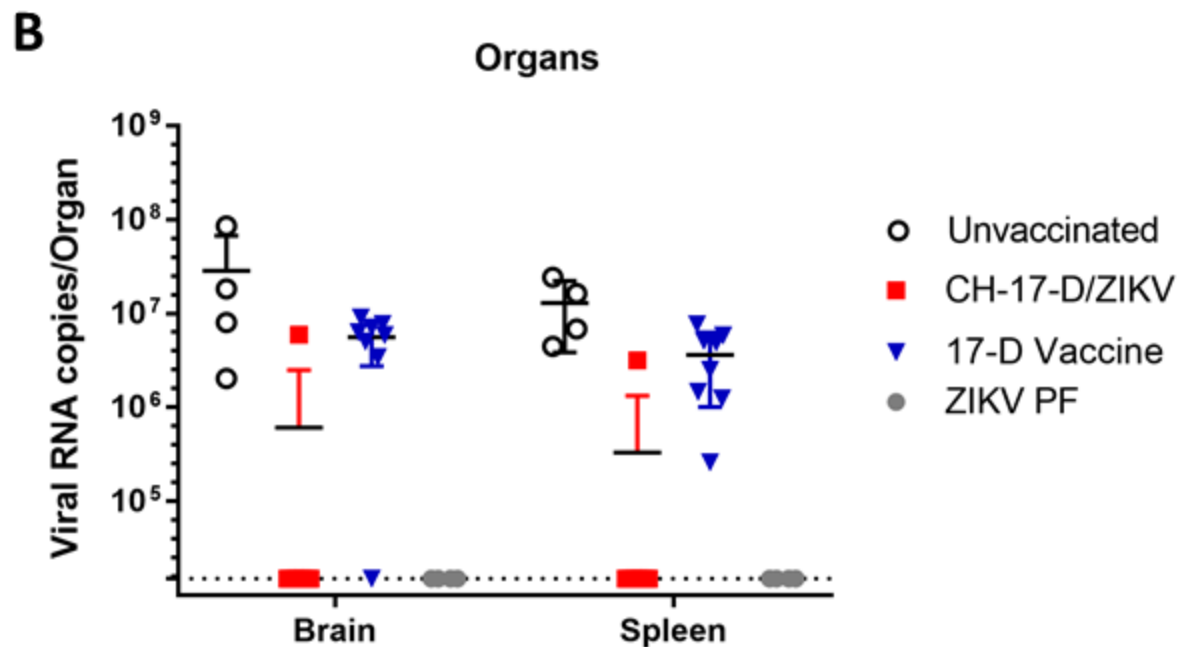

Source: https://www.biorxiv.org/content/10.1101/272625v2.full.pdf
